# Supplementary material for: New insights on MXene and its advanced hybrid materials for lithium-ion batteries
Source: Royal Society of Chemistry journal article supplement (doi:10.1039/d1se01681d), 2022-01-01
Supplement: d1se01681d1.pdf [file d1se01681d1.pdf]

| <b>MXene/Hybrid Composites</b>                                                                      | <b>Initial Charge/Discharge Capacity (mAh/g)</b> | <b>current density</b> | <b>CE (%)</b>                      | <b>Last capacity after cycling</b> | <b>Reference</b>            |
|-----------------------------------------------------------------------------------------------------|--------------------------------------------------|------------------------|------------------------------------|------------------------------------|-----------------------------|
| Layered $Ti_3C_2T_x$                                                                                | 335                                              | 0.1 A/g                | ~100%                              | 260 (1A/g)                         | Song et al. <sup>1</sup>    |
| Functionalized activate titanium carbide nanorod growth on the surface of $Ti_3C_2T_x$ (FTCN-MXene) | 1133                                             | 0.1C                   | 98.78                              | 692 (3C)                           | Nam et al. <sup>2</sup>     |
| $Ti_3C_2T_x/TiO_2$                                                                                  | 272                                              | 0.5 C (50 mA/g)        | -----                              | 140 (after the 200 mA/g)           | Liu et al. <sup>3</sup>     |
| Si/ $Ti_3C_2$                                                                                       | 879                                              | 0.2A/g                 | 69% initial CE                     | 242 (3 A/g)                        | Kong et al. <sup>4</sup>    |
| Si@ $Ti_3C_2$                                                                                       | 3502.3                                           | 0.1A/g                 | 99.8%                              | 1720.8 (1A/g)                      | Yang et al. <sup>5</sup>    |
| $Ti_3C_2T_x$ /Si scrolls                                                                            | 226                                              | 100 mA/g               | 100%                               | 89 (5000 mAh/g)                    | Meng et al. <sup>6</sup>    |
| Si/d- $Ti_3C_2$                                                                                     | 1948                                             | 0.2A/g                 | 98% (after 7 <sup>th</sup> cycles) | 890 (2 A/g)                        | Zhu et al. <sup>7</sup>     |
| SiO/Wrinkled MXene                                                                                  | 1987                                             | 200 mA/g               |                                    | 713 (2000 mA/g)                    | Wei et al. <sup>8</sup>     |
| Binder free Si/MXene composites                                                                     | 2118                                             | 200 mA/g               | 71% (1st cycle)                    | 1672(1000 mA/g)                    | Tian et al. <sup>9</sup>    |
| Si/Alg/MXene(80/16/4)                                                                               | 3800                                             | 0.1C                   | Initial CE 80%                     | 1050 (1C)                          | Sarang et al. <sup>10</sup> |
| $Ti_3C_2T_x$ /Si                                                                                    | 731                                              | 0.1 C                  | 100 %                              | 252 (after 200 cycles)             | Li et al. <sup>11</sup>     |
| SiNP@MX1/MX2                                                                                        | 2865                                             | 0.05 A/g               | 100%                               | 574 (5                             | Li et al. <sup>12</sup>     |

|                                                                       |                         |               |                                     |                                    |                            |
|-----------------------------------------------------------------------|-------------------------|---------------|-------------------------------------|------------------------------------|----------------------------|
|                                                                       |                         |               |                                     | A/g)                               |                            |
| Si/Ti <sub>3</sub> C <sub>2</sub> T <sub>x</sub>                      | 1067.6                  | 300 mA/g      | ----                                | 648 (300 mA/g after 100 cycles)    | Zhang et al. <sup>13</sup> |
| Ti <sub>3</sub> C <sub>2</sub> @Si/SiO <sub>x</sub> @TiO <sub>2</sub> | 1536                    | 100mA/g       | >98%                                | 355 (2000 A/g)                     | Jiang et al. <sup>14</sup> |
| SiO <sub>2</sub> /MXene                                               | 840                     | 0.1 A/g       | 99.99%(after 2 <sup>nd</sup> cycle) | 517 (3A/g)                         | Mu et al. <sup>15</sup>    |
| Si p-NSs@TNs                                                          | 1498                    | 0.1 A/g       | 80.2 % (ICE)                        | 899 (4 A/g)                        | Xia et al. <sup>16</sup>   |
|                                                                       |                         |               |                                     |                                    |                            |
| SiO <sub>2</sub> /Ti <sub>3</sub> C <sub>2</sub>                      | 567                     | 0.1 C         | 99.6                                | 134.2 (5C)                         | Liu et al. <sup>17</sup>   |
| Si/d-Ti <sub>3</sub> C <sub>2</sub>                                   | 1948                    | 0.1 C         | 74% (ICE)                           | 890 (2C)                           | Zhu et al. <sup>7</sup>    |
| Si@MXene capsules                                                     | 1797                    | 0.2 A/g       | 99.6%                               | 759 (2 A/g)                        | Yan et al. <sup>18</sup>   |
| Ti <sub>3</sub> C <sub>2</sub> T <sub>x</sub> /SnO <sub>2</sub>       | 1021                    | 1C (100 mA/g) | 98.5                                | 500 (after 700 cycles)             | Xiong et al. <sup>19</sup> |
| SnO <sub>2</sub> /MXene@200                                           | 843                     | 500 mA/g      | -----                               | 514 (50 cycles)                    | Ahmed et al. <sup>20</sup> |
| 10-SnO <sub>x</sub> /Ti <sub>3</sub> C <sub>2</sub> T <sub>x</sub>    | 729.1                   | 50 mA/g       | -----                               | 581 (50 cycles)                    | Chen et al. <sup>21</sup>  |
| SnO <sub>2</sub> /Ti <sub>3</sub> C <sub>2</sub>                      | 1030.1 mAh/g            | 1C            | 98%                                 | 82 mAh/g (5C)                      | Wang et al. <sup>22</sup>  |
| SnO <sub>2</sub> QDs@d-Ti <sub>3</sub> C <sub>2</sub> T <sub>x</sub>  | 1046                    | 0.5C          | 98%                                 | 350 (10 C)                         | Wang et al. <sup>23</sup>  |
| PVP-Sn(IV)@ Ti <sub>3</sub> C <sub>2</sub>                            | 1637 mA/cm <sup>3</sup> | 50 mA/g       | 99%                                 | 698 mA/cm <sup>3</sup> (3000 mA/g) | Luo et al. <sup>24</sup>   |

|                                                           |                         |          |               |                                  |                            |
|-----------------------------------------------------------|-------------------------|----------|---------------|----------------------------------|----------------------------|
| Snnanocomplexpillared few layer $Ti_3C_2T_x$ MXene (STCT) | 881.5 mAh/g             | 500 mA/g | 97.2%         | 662 (5000) mA/g                  | Zhang et al. <sup>25</sup> |
| 3D Sn@ $Ti_3C_2$                                          | 803mAh/g                | 0.1 A/g  | > 99%         | 238 (3A/g)                       | Wang et al. <sup>26</sup>  |
| 0D–2D SnO <sub>2</sub> QDs/MXene                          | 887.5 mAh/g             | 50 mA/g  | Close to 100% | 364 (3000 mA/g)                  | Liu et al. <sup>27</sup>   |
| SnO <sub>x</sub> @ $Ti_3C_2$                              | 365                     | 0.1 A/g  | 99.9%         | 190 (2A/g)                       | Sun et al. <sup>28</sup>   |
| Sn/SnO <sub>x</sub> @ $Ti_3C_2$                           | 834.5                   | 50 mA/g  | 90.3 % (ICE)  | Discharge capacity 194.5 (5 A/g) | Zuo et al. <sup>29</sup>   |
| Porous- $Ti_3C_2T_x$ CNT                                  | 1250                    | 0.1 C    | 100           | 500 (after 100 cycles)           | Ren et al. <sup>30</sup>   |
| $Ti_3C_2$ /CNT/Fe/CF                                      | 430                     | 1A/g     | 58.7          | 175 (10 A/g)                     | Zheng et al. <sup>31</sup> |
| C-Fe <sub>3</sub> O <sub>4</sub> / $Ti_3C_2$              | 1196.8                  | 0.5 A/g  | -             | 780 (2 A/g)                      | Li et al. <sup>32</sup>    |
| $Ti_3C_2T_x$ -CNTs/SiNPs                                  | 2583                    | 100 mA/g | ---           | 750 (1000 mA/g)                  | Cao et al. <sup>33</sup>   |
| C@Si@CNTs-7.5                                             | 880                     | 100 mA/g | 99%           | 653 (1000 mA/g)                  | Yang et al. <sup>34</sup>  |
| MXene/CNTs@P                                              | 2598                    | 0.05     | 77%           | 454 (30 C)                       | Zhang et al. <sup>35</sup> |
| 1:1 $Ti_3C_2$ / rGO                                       | 473                     | 0.05 A/g | ---           | 16.7 (4A/g)                      | Ma et al. <sup>36</sup>    |
| rGO/ $Ti_2CT_r$                                           | 920                     | 50 mA/g  | >99%          | 300 (2000 mA/g)                  | Xu et al. <sup>37</sup>    |
| $Ti_3C_2$ / $TiO_2$ /rGO                                  | 339                     | 0.1 A/g  | 99%           | 173 (10 A/g)                     | Li et al. <sup>38</sup>    |
| $Ti_3C_2T_x$ -CNT/SiNPs                                   | 5.2 mAh/Cm <sup>2</sup> | 100 mA/g | 62.8 % (ICE)  | 5.3 mAh/Cm <sup>2</sup> (2000)   | Cao et al. <sup>39</sup>   |

|                   |                          |       |                             |               |                            |
|-------------------|--------------------------|-------|-----------------------------|---------------|----------------------------|
|                   |                          |       |                             | mA/g)         |                            |
| T-MXene@C         | 499.4                    | 0.2 C | 56.9% (ICE)                 | 101.5 (100 C) | Zhang et al. <sup>40</sup> |
| MXene/Si@SiOx@C-2 | 1674 mAh g <sup>-1</sup> | 0.2 C | 81.3% (ICE) after that 100% | 510 (10 C)    | Zhang et al. <sup>41</sup> |

1. X. Song, H. Wang, S. Jin, M. Lv, Y. Zhang, X. Kong, H. Xu, T. Ma, X. Luo and H. Tan, *Nano Research*, 2020, **13**, 1659-1667.
2. S. Nam, S. Umrao, S. Oh, K. H. Shin, H. S. Park and I.-K. Oh, *Composites Part B: Engineering*, 2020, **181**, 107583.
3. Y. T. Liu, P. Zhang, N. Sun, B. Anasori, Q. Z. Zhu, H. Liu, Y. Gogotsi and B. Xu, *Advanced Materials*, 2018, **30**, 1707334.
4. F. Kong, X. He, Q. Liu, X. Qi, D. Sun, Y. Zheng, R. Wang and Y. Bai, *Electrochemistry Communications*, 2018, **97**, 16-21.
5. Q. Yang, Z. Wang, Y. Xia, G. Wu, C. Chen, J. Wang, P. Rao and A. Dong, *Journal of Colloid and Interface Science*, 2020.
6. J. Meng, F. Zhang, L. Zhang, L. Liu, J. Chen, B. Yang and X. Yan, *Journal of energy chemistry*, 2020, **46**, 256-263.
7. X. Zhu, J. Shen, X. Chen, Y. Li, W. Peng, G. Zhang, F. Zhang and X. Fan, *Chemical Engineering Journal*, 2019, **378**, 122212.
8. C. Wei, H. Fei, Y. Tian, Y. An, Y. Tao, Y. Li and J. Feng, *Chinese Chemical Letters*, 2020, **31**, 980-983.
9. Y. Tian, Y. An and J. Feng, *ACS applied materials & interfaces*, 2019, **11**, 10004-10011.
10. K. T. Sarang, X. Zhao, D. Holta, M. Radovic, M. J. Green, E.-S. Oh and J. L. Lutkenhaus, *Nanoscale*, 2020, **12**, 20699-20709.
11. H. Li, M. Lu, W. Han, H. Li, Y. Wu, W. Zhang, J. Wang and B. Zhang, *Journal of energy chemistry*, 2019, **38**, 50-54.
12. X. Li, Z. Chen, A. Li, Y. Yu, X. Chen and H. Song, *ACS applied materials & interfaces*, 2020.
13. F. Zhang, Z. Jia, C. Wang, A. Feng, K. Wang, T. Hou, J. Liu, Y. Zhang and G. Wu, *Energy*, 2020, **195**, 117047.
14. M. Jiang, F. Zhang, G. Zhu, Y. Ma, W. Luo, T. Zhou and J. Yang, *ACS applied materials & interfaces*, 2020.
15. G. Mu, D. Mu, B. Wu, C. Ma, J. Bi, L. Zhang, H. Yang and F. Wu, *Small*, 2020, **16**, 1905430.
16. M. Xia, B. Chen, F. Gu, L. Zu, M. Xu, Y. Feng, Z. Wang, H. Zhang, C. Zhang and J. Yang, *ACS nano*, 2020, **14**, 5111-5120.
17. J.-q. Liu, S.-c. Song, D.-c. Zuo, C. Yan, Z.-j. He, Y.-j. Li and J.-c. Zheng, *Ionics*, 2020, 1-7.
18. Y. Yan, X. Zhao, H. Dou, J. Wei, Z. Sun, Y.-S. He, Q. Dong, H. Xu and X. Yang, *ACS applied materials & interfaces*, 2020, **12**, 18541-18550.
19. J. Xiong, L. Pan, H. Wang, F. Du, Y. Chen, J. Yang and C. J. Zhang, *Electrochimica Acta*, 2018, **268**, 503-511.
20. B. Ahmed, D. H. Anjum, Y. Gogotsi and H. N. Alshareef, *Nano Energy*, 2017, **34**, 249-256.
21. H. Chen, 2019.
22. F. Wang, Z. Wang, J. Zhu, H. Yang, X. Chen, L. Wang and C. Yang, *Journal of Materials Science*, 2017, **52**, 3556-3565.

23. L. Wang, Y. He, D. Liu, L. Liu, H. Chen, Q. Hu, X. Liu and A. Zhou, *Journal of The Electrochemical Society*, 2020, **167**, 116522.
24. J. Luo, X. Tao, J. Zhang, Y. Xia, H. Huang, L. Zhang, Y. Gan, C. Liang and W. Zhang, *ACS nano*, 2016, **10**, 2491-2499.
25. S. Zhang, H. Ying, B. Yuan, R. Hu and W.-Q. Han, *Nano-Micro Letters*, 2020, **12**, 1-14.
26. Z. Wang, J. Bai, H. Xu, G. Chen, S. Kang and X. Li, *Journal of Colloid and Interface Science*, 2020.
27. H. Liu, X. Zhang, Y. Zhu, B. Cao and Q. Zhu, *Journal*.
28. X. Sun, Y. Liu, J. Zhang, L. Hou, J. Sun and C. Yuan, *Electrochimica Acta*, 2019, **295**, 237-245.
29. D.-c. Zuo, S.-c. Song, C.-s. An, L.-b. Tang, Z.-j. He and J.-c. Zheng, *Nano Energy*, 2019, **62**, 401-409.
30. C. E. Ren, M. Q. Zhao, T. Makaryan, J. Halim, M. Boota, S. Kota, B. Anasori, M. W. Barsoum and Y. Gogotsi, *ChemElectroChem*, 2016, **3**, 689-693.
31. W. Zheng, P. Zhang, L. Yang, J. Chen, W. Tian, Y. Zhang and Z. Sun, *Ceramics International*, 2018, **44**, 22456-22461.
32. Q. Li, J. Zhou, F. Li and Z. Sun, *Inorganic Chemistry Frontiers*, 2020, **7**, 3491-3499.
33. D. Cao, M. Ren, J. Xiong, L. Pan, Y. Wang, X. Ji, T. Qiu, J. Yang and C. J. Zhang, *Electrochimica Acta*, 2020, 136211.
34. A. Yang, G. Zhou, X. Kong, R. A. Vilá, A. Pei, Y. Wu, X. Yu, X. Zheng, C.-L. Wu and B. Liu, *Nature nanotechnology*, 2020, **15**, 231-237.
35. S. Zhang, H. Liu, B. Cao, Q. Zhu, P. Zhang, X. Zhang, R. Chen, F. Wu and B. Xu, *Journal of Materials Chemistry A*, 2019, **7**, 21766-21773.
36. Z. Ma, X. Zhou, W. Deng, D. Lei and Z. Liu, *ACS applied materials & interfaces*, 2018, **10**, 3634-3643.
37. S. Xu, Y. Dall'Agnese, J. Li, Y. Gogotsi and W. Han, *Chemistry—A European Journal*, 2018, **24**, 18556-18563.
38. Z. Li, G. Chen, J. Deng, D. Li, T. Yan, Z. An, L. Shi and D. Zhang, *ACS Sustainable Chemistry & Engineering*, 2019, **7**, 15394-15403.
39. A. M. Cao, J. S. Hu, H. P. Liang and L. J. Wan, *Angewandte Chemie International Edition*, 2005, **44**, 4391-4395.
40. P. Zhang, R. A. Soomro, Z. Guan, N. Sun and B. Xu, *Energy Storage Materials*, 2020.
41. Y. Zhang, Z. Mu, J. Lai, Y. Chao, Y. Yang, P. Zhou, Y. Li, W. Yang, Z. Xia and S. Guo, *ACS nano*, 2019, **13**, 2167-2175.
